# Supplementary material for: Evaluation of polygenic scores for hypertrophic cardiomyopathy in the general population and across clinical settings
Source: Nat Genet. 2025 Feb 18;57(3):563–71. doi: 10.1038/s41588-025-02094-5 (PMC11906360; doi:10.1038/s41588-025-02094-5)
Supplement: Supplementary file 3 — Supplementary Tables 1–13. [file 41588_2025_2094_MOESM3_ESM.xlsx]

## Sheet: Contents
Contents
Supplementary Table 1: Performance of different HCM PGS in UK Biobank
Supplementary Table 2: HCM OR for range of PGS-MTAG quantiles when comparing top with bottom/median quantiles in UK Biobank participants
Supplementary Table 3: PGS-MTAG association with clinical outcomes between top centile and median bottom quintiles in UKB
Supplementary Table 4: PGS-GWAS association with cardiac magnetic resonance imaging traits in UK Biobank
Supplementary Table 5: Comparison of CMR traits in top centile, median quintile, and and bottom PGS-GWAS centiles in the UK Biobank
Supplementary Table 6: PGS-GWAS associations with CMR traits in UKB excluding participants with HCM
Supplementary Table 7: Significant HCM-MTAG PGS phenome-wide associations (pheWAS)
Supplementary Table 8: Mendelian randomization of potentially causal risk factors for HCM
Supplementary Table 9: PGS-GWAS association with CMR traits in non-White ancestry participants in the UK Biobank
Supplementary Table 10: PGS-GWAS and PGS-East Asian association with CMR traits in 111 East Asian participants in the UK Biobank
Supplementary Table 11: CMR traits in SARC-PLP and SARC-Neg/top PGS-GWAS percentile participants in the UKB
Supplementary Table 12: PGS-MTAG association with clinical outcomes in HCM cases in UKB
Supplementary Table 13: PGS-RBH association with CMR traits in sarcomere-positive HCM cases in Royal Brompton Hospital, UK

## Sheet: Supplementary Table 1
Supplementary Table 1: Performance of different HCM PGS in UK Biobank
PGS Score	R2	AUROC	Per PGS SD	HCM OR
				Per PGS Decile	Top Decile vs. Median
PGS-GWAS	0.031	0.73	1.97	1.26	5.5
PGS-MTAG	0.048	0.8	2.34	1.33	5.9
PGS-RBH	0.044	0.79	2.25	1.32	6.5
PGS-EMC	0.042	0.79	2.22	1.3	3.5
PGS-GeL	0.036	0.78	2.09	1.29	3.7
Assessment of all PGS used in the study in 343,182 UKB participants of unrelated White British ancestry
AUROC = area under receiver operating curve; MTAG = multi-trait analysis of GWAS; RBH = Royal Brompton Hospital; UK; EMC = Erasmus Medical Centre, NL; GeL = 100,000 Genomes Project
PGS-RBH - PGS generated from multi-trait analysis of GWAS excluding RBH cohort
PGS-EMC - PGS generated from multi-trait analysis of GWAS excluding EMC cohort
PGS-GeL - PGS generated from multi-trait analysis of GWAS excluding GeL cohort

## Sheet: Supplementary Table 2
Supplementary Table 2: HCM OR for range of PGS-MTAG quantiles when comparing top with bottom/median quantiles in UK Biobank participants
Quantile	Top vs Bottom*			Top vs Median**				Top vs. Rest
	OR	95% CI	P	OR	95% CI	P	OR	95% CI	P
2	5	2.8 to 9.2	1.46643e-07	-	-	-	3	2.4 to 3.9	4.9e-20
3	6.5	3.6 to 11.9	1.29938e-09	2.7	2.0 to 3.6	8.4608e-11	3.7	3.0 to 4.6	1.4e-32
4	7.7	4.2 to 14.2	4.08937e-11	3.2	2.4 to 4.3	5.23476e-14	4.1	3.3 to 5	5.2e-40
5	9	4.9 to 16.5	1.40006e-12	3.7	2.7 to 5.0	3.11006e-17	4.6	3.7 to 5.7	8.9e-48
10	13	7.1 to 24.1	2.7619e-16	5.3	3.9 to 7.3	4.79406e-25	5.6	4.5 to 6.9	8.3e-57
20	17.6	9.4 to 32.9	2.86653e-19	7.3	5.2 to 10.2	1.13235e-30	6.7	5.3 to 8.5	5.6e-57
50	25.3	13.2 to 48.5	3.26019e-22	10.3	7.0 to 15.0	1.10296e-32	8.4	6.3 to 11.3	4e-46
100	36.6	18.6 to 72.2	2.92484e-25	14.5	9.5 to 22.2	3.46568e-35	11.3	8.0 to 15.9	7.7e-44
HCM odds ratios in 343,182 White British UK Biobank participants, comparing increasing extremes of PGS (top quantile) with the bottom decile, median quintile, and all participants not in the higher PGS group ('rest').
Effect estimates and 95% confidence intervals generated using logistic regression adjusting for age, age2, sex, and top ten genetic PCs, with unadjusted two-sided P value.
*Compared with bottom 10%
**Compared with median 20%

## Sheet: Supplementary Table 3
Supplementary Table 3: PGS-MTAG association with clinical outcomes between top centile and median bottom quintiles in UKB
		Top Centile vs Bottom Quintile				Top Centile vs Median Quintile
Outcome	HR	CI	P-value	Adjusted P-value*	HR	CI	P-value	Adjusted P-value*
HCM composite	1.07	0.98 to 1.16	0.13	0.2	1.11	1.03 to 1.21	0.011	0.033
HCM hard composite	0.99	0.88 to .11	0.87	0.87	0.99	0.88 to 1.11	0.8	0.8
Major adverse cardiovascular event	1.07	0.98 to 1.16	0.13	0.2	1.09	1 to 1.18	0.042	0.063
HCM	3.19	2.38 to 4.28	1e-14	-	3.46	2.57 to 4.65	2.1e-16	-
Death	0.99	0.87 to 1.13	0.89	-	0.99	0.87 to 1	0.83	-
Heart failure	0.84	0.7 to 1.02	0.072	-	0.99	0.82 to 1.2	0.93	-
Atrial fibrillation or flutter	1.26	1.12 to 1.41	0.00012	-	1.28	1.14 to 1.44	1.8e-05	-
Stroke	1.05	0.87 to 1.28	0.61	-	1.02	0.84 to 1.23	0.84	-
Cardiac arrest	1.12	0.73 to 1.72	0.62	-	1.19	0.78 to 1.81	0.43	-
ICD implantation	0.8	0.45 to 1.42	0.45	-	1.21	0.69 to 1.21	0.5	-
Alcohol septal ablation or surgical myectomy	10.09	0.71 to 142.5	0.087	-	2.39	0.31 to 18.56	0.41	-
LVAD implantation or cardiac transplantation	3.94	0.85 to 18.3	0.08	-	5.69	1.25 to 25.9	0.025	-
Association of PGS-MTAG with adverse outcomes in individuals with HCM in UKB. Full outcome definitions described in Supplmentary Methods. The primary outcomes were HCM composite, HCM hard composite, and major adverse cardiovascular event.
Effect estimates and 95% confidence intervals generated using Cox proportional hazards model adjusting for age, age2, sex, and top ten genetic PCs.
*Benjamini-Hochberg two-sided adjusted P-values for primary outcomes
**No events in either group
HCM = hypertrophic cardiomyopathy; ICD = implantable cardiac defibrillator; LVAD = left ventricular assist device

## Sheet: Supplementary Table 4
Supplementary Table 4: PGS-GWAS association with cardiac magnetic resonance imaging traits in UK Biobank
Trait	Change per PGS SD	P-value	Adjusted P-value*
LV maximum wall thickness (mm)	0.13	1.1e-80	1.1e-79
LV mass (g)	0.29	6e-05	7.5e-05
LV ejection fraction (%)	0.57	2.7e-64	1.4e-63
LV end-diastolic volume (ml)	-2.03	1.2e-46	4e-46
LV end-systolic volume (ml)	-1.67	6.9e-80	4.6e-79
LA volume (ml)	0.02	0.9	0.9
RV end-diastolic volume (ml)	-1.08	2.3e-13	4.6e-13
RV end-systolic volume (ml)	-0.85	2.7e-22	7.7e-22
RV ejection fraction (%)	0.26	1.1e-14	2.8e-14
RA volume (ml)	-0.74	3.9e-07	6e-07
Global radial strain	0.75	1.2e-62	4.8e-62
Global longitudinal strain	-0.1	2e-10	3.6e-10
Global circumferential strain	-0.39	6.2e-99	1.2e-97
Longitudinal strain rate	0.01	1.1e-05	1.5e-05
Radial strain rate	-0.09	2.2e-14	4.9e-14
Global fractal dimension (mean)	0	1.6e-06	2.3e-06
Basal fractal dimension (mean)	0	0.0085	0.01
Apical fractal dimension (mean)	0	1e-07	1.7e-07
Basal fractal dimension (max)	0	0.15	0.16
Apical fractal dimension (max)	0	0.1	0.11
PGS-GWAS associations with quantitiative CMR traits in 30,663 UKB participants.
Effect estimates and 95% confidence intervals generated using linear regression adjusting for age, age2, sex, body surface area, systolic blood pressure at time of scan, and top ten genetic PCs.
*Benjamini-Hochberg adjusted two-sided P-values
LV = Left Ventricle; LA = Left Atrium; RV = Right Ventricle; RA = Right Atrium

## Sheet: Supplementary Table 5
Supplementary Table 5: Comparison of CMR traits in top centile, median quintile, and and bottom PGS-GWAS centiles in the UK Biobank
Trait	Lowest Centile Mean (N=304)	Median Quintile Mean (N=30,358)	Highest Centile Mean (N=305)	Top vs. Bottom centile P-value	Top vs. Bottom centile Adjusted P-value*	Top vs. Median quintile P-value	Top vs. Median Quintile Adjusted P-value*
LV maximum wall thickness (mm)	9.1	9.4	9.8	9e-09	3.6e-08	1.9e-07	5.5e-07
LV mass (g)	85.6	86.3	86.3	0.82	0.82	0.6	0.66
LV ejection fraction (%)	57.7	59.5	61.3	2.7e-13	2.7e-12	2e-07	5.7e-07
LV end-diastolic volume (ml)	154.9	148.3	142.1	8.3e-08	2.8e-07	0.00013	0.00024
LV end-systolic volume (ml)	66.4	60.7	55.9	2.7e-10	1.8e-09	1.1e-06	2.6e-06
LA volume (ml)	74	72.9	71.4	0.085	0.12	0.25	0.31
RV end-diastolic volume (ml)	157.5	157	151.1	0.00031	0.00078	0.00063	0.0013
RV end-systolic volume (ml)	68.8	67.7	63.6	5.2e-06	1.5e-05	4.5e-05	9.2e-05
RV ejection fraction (%)	56.8	57.3	58.2	0.0012	0.0027	0.0073	0.011
RA volume (ml)	88.9	86.8	84	0.0054	0.0098	0.059	0.08
Global radial strain	43	45.1	47	2.6e-09	1.3e-08	2.7e-05	5.8e-05
Global longitudinal strain	-18.1	-18.5	-18.8	0.0042	0.084	0.051	0.07
Global circumferential strain	-21	-22.3	-23.4	1.6e-17	3.2e-16	7.2e-10	2.5e-09
Longitudinal strain rate	1.6	1.6	1.6	0.22	0.26	0.71	0.75
Radial strain rate	-5.4	-5.6	-5.7	0.062	0.1	0.33	0.39
Global fractal dimension (mean)	1.2	1.17	1.17	0.066	0.1	0.024	0.033
Basal fractal dimension (mean)	1.19	1.19	1.18	0.16	0.2	0.11	0.14
Apical fractal dimension (mean)	1.14	1.14	1.13	0.09	0.12	0.044	0.061
Basal fractal dimension (max)	1.27	1.27	1.27	0.37	0.41	0.28	0.34
Apical fractal dimension (max)	1.21	1.21	1.21	0.49	0.52	0.081	0.11
Comparison of means of quantitative CMR traits in the top and bottom centiles, and median quintile, in 30,663 UKB participants.
Ancova adjusting for age, age2, sex, body surface area, systolic blood pressure at time of scan, and top ten genetic PCs.
*Benjamini-Hochberg adjusted two-sided P-values
LV = Left Ventricle; LA = Left Atrium; RV = Right Ventricle; RA = Right Atrium

## Sheet: Supplementary Table 6
Supplementary Table 6: PGS-GWAS associations with CMR traits in UKB excluding participants with HCM
Trait	Change per PGS SD	P-value	Adjusted P-value*
LV maximum wall thickness (mm)	0.13	6.3e-84	6.3e-83
LV mass (g)	0.24	0.0006	0.00075
LV ejection fraction (%)	0.57	1.9e-64	9.5e-64
LV end-diastolic volume (ml)	-2.01	1.1e-45	3.7e-45
LV end-systolic volume (ml)	-1.66	7.9e-79	5.3e-78
LA volume (ml)	0	1	1
RV end-diastolic volume (ml)	-1.03	3.3e-12	6.6e-12
RV end-systolic volume (ml)	-0.83	4.4e-21	1.3e-20
RV ejection fraction (%)	0.26	1.2e-14	3e-14
RA volume (ml)	-0.72	8.4e-07	1.3e-06
Global radial strain	-0.75	2.1e-62	8.4e-62
Global longitudinal strain	-0.1	7.8e-11	1.4e-10
Global circumferential strain	-0.39	1.5e-99	3e-98
Longitudinal strain rate	0.01	8.1e-06	1e-05
Radial strain rate	-0.09	1.4e-14	3.1e-14
Global fractal dimension (mean)	0	1.3e-06	1.9e-06
Basal fractal dimension (mean)	0	0.0095	0.011
Apical fractal dimension (mean)	0	8.1e-08	1.4e-07
Basal fractal dimension (max)	0	0.19	0.2
Apical fractal dimension (max)	0	0.089	0.01
PGS-GWAS associations with quantitiative CMR traits in UKB (N=30,537) excluding participants with HCM
Effect estimates generated using linear regression adjusting for age, age2, sex, body surface area, systolic blood pressure at time of scan, and top ten genetic PCs, multiplied by PGS standard deviation.
*Benjamini-Hochberg adjusted two-sided P-values
LV = Left Ventricle; LA = Left Atrium; RV = Right Ventricle; RA = Right Atrium

## Sheet: Supplementary Table 7
Supplementary Table 7: Significant HCM-MTAG PGS phenome-wide associations (pheWAS)
Phenotype	Phecode	Included ICD-9 codes	Included ICD-10 codes	N cases	N controls	OR per PGS SD	P-value*
Other hypertrophic cardiomyopathy	425.12	425.18	I42.2	309	368528	2.3	9.8x10-51
Hypertrophic obstructive cardiomyopathy	425.11	425.1, 425.11	I42.1	203	368528	2.23	1.4x10-31
Heart failure NOS	428.2	428.1, 428.9	I50, I50.1, I50.9	6298	363992	0.89	2.3x10-19
Hypertension	401	997.91	-	107539	266347	1.03	2.2x10-17
Essential hypertension	401.1	401, 401.1, 401.9	I10	107343	266347	1.03	2.3x10-17
Heart failure	428	ar	-	9064	363992	0.92	3.1x10-16
Disorders of lipid metabolism	272	272	-	53226	320660	1.03	6.0x10-10
Hyperlipidaemia	272.1	272.4	E78.4, E78.5	52995	320660	1.03	6.8x10-10
Hypercholesterolaemia	272.11	272	E78.0	49086	320660	1.03	1.1x10-9
Congestive heart failure	428.1	398.91, 428	I50.0	4216	363992	0.93	8.2x10-7
Abnormal heart sounds	396	785.2, 785.3	R00, R01, R01.0, R01.1, R01.2	2550	358078	1.1	1.3x10-6
Type 2 diabetes	250.2	250, 250.02, 250.2, 250.22, 250.3, 250.32, 250.8, 250.82, 250.9, 250.92,	E11, E11.0, E11.6, E11.7, E11.8, E11.9, E13, E13.5, E13.6, E13.7, E13.8, E13.9, E14.9	26753	345062	1.03	2.4x10-6
Diabetes mellitus	250	250, 250.1, 250.2, 250.3, 250.4, 250.5, 250.6, 250.7, 250.8, 250.9	-	27652	345062	1.03	4.0x10-6
Other forms of chronic heart disease	414	429, 429.1, 429.5, 429.6, 429.8, 429.89, 429.9	I23.4, I23.5, I46.1, I51.1, I51.2, I51.5, I51.8, I51.9, I52	5521	330530	0.94	4.1x10-6
Secondary/extrinsic cardiomyopathy	425.2	425.7, 425.8, 425.9	I43, I43.8	31	368528	0.45	1.1x10-5
Significant phenome-wide associations with PGS-MTAG, highlighting ICD codes included in each phenotype.
Effect estimates generated using logistic regression adjusting for age and sex.
*Adjusted P value threshold of 2.7x10-5 (1,839 clinical phenotypes tested)

## Sheet: Supplementary Table 8
Supplementary Table 8: Mendelian randomization of potentially causal risk factors for HCM
Exposure	Study	Study year	Sample size	Population	Total SNPs	N SNPs*	MR P-value	Heterogeneity P-value	Egger intercept	Horizontal pleiotropy P-value
Systolic blood pressure	International Consortium of Blood Pressure(1)	2018	757601	European	7088083	396	4.1x10-4	0	-0.0057	0.24
Diastolic blood pressure	International Consortium of Blood Pressure(1)	2018	757601	European	7160619	397	1.7x10-5	0	0.0038	0.48
Body mass index	MRC IEU(2)	2021	461460	European	9851867	378	1.3x10-6	0	0.0068	0.079
HbA1c	MAGIC(3)	2021	146806	European	30649064	228	0.75	-	-	-
LDL	Global Lipids Genetics Consortium(4)	2013	94595	European	2409690	71	0.74	-	-	-
HDL	Global Lipids Genetics Consortium(4)	2013	94595	European	2418527	86	0.34	-	-	-
Two-sample MR performed using Inverse variance weighted method. Heterogeneity and horizontal pleiotropy P values added for MR significant traits.
* Number of SNPs used in MR after harmonisation of exposure and outcome instruments
References
1. Evangelou, E., et al. Genetic analysis of over 1 million people identifies 535 new loci associated with blood pressure traits. Nat Genet 50, 1412–1425 (2018)
2. The MRC IEU OpenGWAS data infrastructure Ben Elsworth, et al. bioRxiv 2020.08.10.244293
3. Chen, J., et al. The trans-ancestral genomic architecture of glycemic traits. Nat Genet 53, 840–860 (2021)
4. Global Lipids Genetics Consortium. Discovery and refinement of loci associated with lipid levels. Nat Genet 45, 1274–1283 (2013)

## Sheet: Supplementary Table 9
Supplementary Table 9: PGS-GWAS association with CMR traits in non-White ancestry participants in the UK Biobank
			African					South Asian					East Asian
Trait	Per PGS SD	UCI	LCI	P-value	Adjusted P-value*	Per PGS SD	LCI	UCI	P-value	Adjusted P-value*	Per PGS SD	LCI	UCI	P-value	Adjusted P-value*
LV maximum wall thickness (mm)	0.05	-0.13	0.23	0.59	0.683158	0.07	-0.05	0.18	0.26	0.3575	0.21	-0.03	0.45	0.097	0.3025
LV global wall thickness (mm)	0.05	-0.03	0.14	0.2	0.314286	0.04	-0.01	0.1	0.12	0.203077	0.11	0	0.22	0.055	0.3025
LV mass (g)	0.11	-2	2.22	0.92	0.92	0.03	-1.2	1.27	0.96	0.96	1.48	-0.62	3.58	0.17	0.415556
LV ejection fraction (%)	0.79	-0.12	1.7	0.092	0.314286	1.38	0.74	2.03	3.2e-05	0.000352	1.19	0.1	2.29	0.036	0.3025
LV end-diastolic volume (ml)	-3.01	-7.64	1.61	0.2	0.314286	-1.99	-4.35	0.37	0.1	0.183333	-2.71	-5.93	0.5	0.1	0.3025
LV end-systolic volume (ml)	-2.69	-6.03	0.64	0.12	0.314286	-2.66	-4.02	-1.3	0.00016	0.00117333	-2.47	-4.29	-0.65	0.0093	0.2046
LA volume (ml)	-2.07	-5.22	1.08	0.2	0.314286	2.36	0.57	4.15	0.01	0.0366667	-2.04	-5.97	1.88	0.31	0.568333
RV end-diastolic volume (ml)	-2.82	-6.81	1.16	0.17	0.314286	-0.96	-3.39	1.47	0.44	0.569412	-1.39	-5.06	2.27	0.46	0.778462
RV end-systolic volume (ml)	-3	-5.46	-0.54	0.018	0.198	-1.88	-3.36	-0.4	0.014	0.044	-0.73	-2.95	1.49	0.52	0.817143
RV ejection fraction (%)	1	0.25	1.76	0.0099	0.198	1.1	0.43	1.77	0.0014	0.0077	0.24	-0.93	1.41	0.69	0.891
RA volume (ml)	-2.64	-6.63	1.35	0.2	0.314286	0.24	-2	2.48	0.83	0.913	-0.7	-4.53	3.14	0.72	0.891
Negative global radial strain	0.83	-0.4	2.06	0.19	0.314286	1.23	0.34	2.12	0.0071	0.03124	1.39	-0.15	2.93	0.08	0.3025
Global longitudinal strain	-0.03	-0.41	0.35	0.87	0.911429	-0.3	-0.62	0.02	0.067	0.1474	-0.37	-0.95	0.21	0.22	0.484
Global circumferential strain	-0.37	-0.83	0.1	0.12	0.314286	-0.76	-1.11	-0.42	2e-05	0.000352	-0.59	-1.18	0	0.055	0.3025
Longitudinal strain rate	-0.01	-0.09	0.07	0.82	0.902	0.01	-0.06	0.08	0.75	0.913	-0.03	-0.16	0.09	0.62	0.891
Radial strain rate	-0.11	-0.39	0.18	0.47	0.574444	-0.2	-0.43	0.03	0.086	0.172	0	-0.47	0.47	0.99	0.99
Global fractal dimension (mean)	0	-0.01	0	0.095	0.314286	0	0	0	0.92	0.96	0	-0.01	0.01	0.78	0.891
Basal fractal dimension (mean)	-0.01	-0.01	0	0.065	0.314286	0	0	0.01	0.23	0.3575	0	-0.01	0.01	0.8	0.891
Apical fractal dimension (mean)	0	-0.01	0	0.26	0.381333	0	-0.01	0	0.25	0.3575	0	-0.01	0.01	0.87	0.911429
Basal fractal dimension (max)	-0.01	-0.01	0	0.081	0.314286	0	0	0.01	0.054	0.132	0	-0.01	0.01	0.81	0.891
Apical fractal dimension (max)	0	-0.02	0.01	0.33	0.45375	0	-0.01	0.01	0.8	0.913	0.01	-0.01	0.02	0.3	0.568333
Association between PGS-GWAS generated using ancestry-specific linkage disequilibrium references and quantitative CMR traits in African (N=222), South (N=323) and East Asian (N=111) participants in the UK Biobank.
Effect estimates generated using linear regression adjusting for age, age2, sex, body surface area, systolic blood pressure at time of scan, and top ten genetic PCs, multiplied by PGS standard deviation within each ancestral group.
*Benjamini-Hochberg adjusted two-sided P-values
LV = Left Ventricle; LA = Left Atrium; RV = Right Ventricle; RA = Right Atrium

[truncated: 4 more sheets: Supplementary Table 10, Supplementary Table 11, Supplementary Table 12, Supplementary Table 13]
